# Supplementary material
Source: PubMed Central journal article supplement (PMC3760536)
Supplement: Supp_Mat.pdf [file Supp_Mat.pdf]

## Centres participating in AMIS Plus 1997–2011

The authors would like to express their gratitude to the teams of the following hospitals (listed in alphabetical order with the name of the local principal investigator): Aarau, Kantonsspital (P Lessing), Affoltern am Albis, Bezirksspital (F Hess), Altdorf, Kantonsspital (R Simon), Altstätten, Kantonales Spital (PJ Hangartner), Baden, Kantonsspital (U Hufschmid), Basel, Kantonsspital (P Hunziker), Basel, St Claraspital (C Grädel), Bern, Beau-Site Klinik (A Schönfelder), Bern, Inselspital (S Windecker), Biel, Spitalzentrum (H Schläpfer/C), Brig-Glis, Oberwalliser Kreisspital (D Evéquoz), Bülach, Spital (G Mang), Burgdorf, Regionalspital Emmental (D Ryser), Chur, Rätisches Kantons- und Regionalspital (P Müller), Chur, Kreuzspital (R Jecker), Davos, Spital (W Kistler), Dornach, Spital (A Droll/T Hongler), Einsiedeln, Regionalspital (S Stäuble), Flawil, Spital (G. Freiwald), Frauenfeld, Kantonsspital (HP Schmid), Fribourg, Hôpital cantonal (JC Stauffer/S Cook), Frutigen, Spital (K Bietenhard), Genève, Hôpitaux universitaires (JM Gaspoz/PF Keller), Glarus, Kantonsspital (W Wojtyna), Grenchen, Spital (B Oertli/R Schönenberger), Grosshöchstetten, Bezirksspital (C Simonin), Heiden, Kantonales Spital (R Waldburger), Herisau, Kantonales Spital (M Schmidli), Interlaken, Spital (EM Weiss), Jegenstorf, Spital (H Marty), Kreuzlingen, Herzzentrum Bodensee (K Weber), La Chaux-de-Fonds, Hôpital (H Zender), Lachen, Regionalspital (C Steffen), Langnau im Emmental, Regionalspital (A Hugli), Laufenburg, Gesundheitszentrum Fricktal (J Frei/E Koltai), Lugano, Cardiocentro Ticino (G Pedrazzini), Luzerner Kantonsspital Luzern (P Erne), Luzerner Kantonsspital Sursee, Spital (S Yoon), Luzerner Kantonsspital Wolhusen (M. Peter), Männedorf, Kreisspital (T Heimes), Martigny, Hôpital régional (B Jordan), Mendrisio, Ospedale regionale (A Pagnamenta), Meyrin, Hôpital de la Tour (P Urban), Monthey, Hôpital du Chablais (P Feraud), Montreux, Hôpital de Zone (E Beretta), Moutier, Hôpital du Jura bernois (C Stettler), Münsingen, Regionales Spital Zentrum (F Repond), Münsterlingen, Kantonsspital (F Widmer), Muri, Kreisspital für das Freiamt (C Heimgartner), Nyon, Group. Hosp. Ouest lémanique (R Polikar), Olten, Kantonsspital (S Bassetti), Rheinfelden, Gesundheitszentrum Fricktal (HU Iselin), Rorschach, Kantonales Spital (M Giger), Samedan, Spital Oberengadin (P Egger), Sarnen, Kantonsspital Obwalden (T Kaeslin), Schaffhausen, Kantonsspital (A Fischer), Schlieren, Spital Limmattal (T Herren/B Caduff), Schwyz, Spital (P Eichhorn), Scuol, Ospidal d'Engiadina Bassa (C Neumeier/G Flury), Solothurn, Bürgerspital Solothurn (A Grêt/R Schönenberger), St Gallen, Kantonsspital (H Rickli), Tiefenau, Tiefenauspital (P Loretan), Thun, Spital (U Stoller), Thusis, Krankenhaus (UP Veragut), Uster, Spital (E Bächli), Uznach, Kantonales Spital (A Weber), Wädenswil, Schwerpunktspital Zimmerberg-Horgen (B Federspiel), Walenstadt, Kantonales Spital (D Schmidt/J Hellermann), Wetzikon, GZO Spital (M Graber), Winterthur, Kantonsspital (T Fischer), Zofingen, Spital (S Gasser), Zollikerberg, Spital (R Fatjo), Zug, Kantonsspital (M Vogt/D Ramsay), Zürich, Klinik im Park (O Bertel), Zürich, Universitätsspital Zürich (M Maggiorini), Zürich, Stadtspital Triemli (F Eberli), and Zürich, Stadtspital Waid (M Fischler/S Christen).
